# Supplementary material for: Human Papillomavirus Genotype Distributions: Implications for Vaccination and Cancer Screening in the United States
Source: PubMed Central journal article supplement — J Natl Cancer Inst. 2009 Apr 1;101(7):475–87. doi: 10.1093/jnci/djn510 (PMC2664090; doi:10.1093/jnci/djn510), 2009-04-01
Supplement: djn510_1.pdf [file djn510_1.pdf]

**Supplementary Table 1.** Agreement between PGMY09/11 and SPF<sub>10</sub> assays among specimens that tested human papillomavirus (HPV) positive by PGMY09/11\*

| HPV type†    | Control specimens (n=49)       |     |     |     |          | CIS/AIS specimens (n=72)       |     |     |     |          | Invasive cancer specimens (n=136) |     |     |     |          |
|--------------|--------------------------------|-----|-----|-----|----------|--------------------------------|-----|-----|-----|----------|-----------------------------------|-----|-----|-----|----------|
|              | PGMY09/11 vs SPF <sub>10</sub> |     |     |     |          | PGMY09/11 vs SPF <sub>10</sub> |     |     |     |          | PGMY09/11 vs SPF <sub>10</sub>    |     |     |     |          |
|              | -/-                            | +/+ | +/- | -/+ | Disagree | -/-                            | +/+ | +/- | -/+ | Disagree | -/-                               | +/+ | +/- | -/+ | Disagree |
|              | n                              | n   | n   | n   | %        | n                              | n   | n   | n   | %        | n                                 | n   | n   | n   | %        |
| 06           | 43                             | 5   | 0   | 1   | 2.0      | 71                             | 0   | 1   | 0   | 1.4      | 134                               | 1   | 0   | 1   | 0.7      |
| 11           | 49                             | 0   | 0   | 0   | 0.0      | 72                             | 0   | 0   | 0   | 0.0      | 136                               | 0   | 0   | 0   | 0.0      |
| 16           | 38                             | 11  | 0   | 0   | 0.0      | 34                             | 37  | 1   | 0   | 1.4      | 45                                | 87  | 3   | 1   | 2.9      |
| 18           | 44                             | 3   | 1   | 1   | 4.1      | 68                             | 3   | 0   | 1   | 1.4      | 120                               | 16  | 0   | 0   | 0.0      |
| 31           | 48                             | 1   | 0   | 0   | 0.0      | 55                             | 17  | 0   | 0   | 0.0      | 130                               | 4   | 1   | 1   | 1.5      |
| 33           | 47                             | 2   | 0   | 0   | 0.0      | 63                             | 9   | 0   | 0   | 0.0      | 131                               | 4   | 1   | 0   | 0.7      |
| 35           | 47                             | 2   | 0   | 0   | 0.0      | 65                             | 6   | 1   | 0   | 1.4      | 133                               | 2   | 0   | 1   | 0.7      |
| 39           | 45                             | 4   | 0   | 0   | 0.0      | 70                             | 1   | 1   | 0   | 1.4      | 134                               | 1   | 1   | 0   | 0.7      |
| 40           | 48                             | 1   | 0   | 0   | 0.0      | 72                             | 0   | 0   | 0   | 0.0      | 136                               | 0   | 0   | 0   | 0.0      |
| 42           | 45                             | 0   | 4   | 0   | 8.2      | 72                             | 0   | 0   | 0   | 0.0      | 136                               | 0   | 0   | 0   | 0.0      |
| 45           | 48                             | 1   | 0   | 0   | 0.0      | 71                             | 1   | 0   | 0   | 0.0      | 130                               | 6   | 0   | 0   | 0.0      |
| 51           | 45                             | 1   | 1   | 2   | 6.1      | 67                             | 4   | 0   | 1   | 1.4      | 136                               | 0   | 0   | 0   | 0.0      |
| 52           | 42                             | 4   | 1   | 2   | 6.1      | 66                             | 2   | 1   | 3   | 5.6      | 129                               | 6   | 0   | 1   | 0.7      |
| 53           | 43                             | 4   | 1   | 1   | 4.1      | 68                             | 3   | 1   | 0   | 1.4      | 135                               | 0   | 1   | 0   | 0.7      |
| 54           | 42                             | 6   | 1   | 0   | 2.0      | 72                             | 0   | 0   | 0   | 0.0      | 136                               | 0   | 0   | 0   | 0.0      |
| 56           | 45                             | 3   | 0   | 1   | 2.0      | 70                             | 0   | 1   | 1   | 2.8      | 135                               | 1   | 0   | 0   | 0.0      |
| 58           | 44                             | 3   | 2   | 0   | 4.1      | 69                             | 2   | 1   | 0   | 1.4      | 129                               | 6   | 1   | 0   | 0.7      |
| 59           | 46                             | 3   | 0   | 0   | 0.0      | 72                             | 0   | 0   | 0   | 0.0      | 134                               | 2   | 0   | 0   | 0.0      |
| 66           | 44                             | 5   | 0   | 0   | 0.0      | 72                             | 0   | 0   | 0   | 0.0      | 136                               | 0   | 0   | 0   | 0.0      |
| 68/73        | 46                             | 2   | 1   | 0   | 2.0      | 71                             | 0   | 1   | 0   | 1.4      | 132                               | 2   | 1   | 1   | 1.5      |
| Any of above | 1                              | 43  | 5   | 0   | 10.2     | 0                              | 71  | 1   | 0   | 1.4      | 1                                 | 131 | 2   | 2   | 2.9      |

\* -/- = negative for both assays; +/+ = positive for both assays; +/- = positive for PGMY09/11 and negative for SPF<sub>10</sub>; -/+ = negative for PGMY09/11 and positive for SPF<sub>10</sub>. Percent disagreement calculated as 100 times the sum of +/- and -/+ divided by sum of -/-, +/+, +/- and -/+. 68/73 = HPV68 or HPV73.

†All of the specimens tested positive for HPV by PGMY09/11, but only HPV types in common to PGMY09/11 and SPF<sub>10</sub> are shown.

**Supplementary Table 2.** Comparison of human papillomavirus (HPV) type frequency between PGMY09/11 and SPF<sub>10</sub> for 282 invasive cancer specimens\*

| HPV type     | PGMY09/11 HPV positive (n=136) |      |                   |      | PGMY09/11 HPV negative (n=136) |      |       | Beta-globin negative (n=10) |      |       |
|--------------|--------------------------------|------|-------------------|------|--------------------------------|------|-------|-----------------------------|------|-------|
|              | PGMY09/11                      |      | SPF <sub>10</sub> |      | SPF <sub>10</sub>              |      |       | SPF <sub>10</sub>           |      |       |
|              | n                              | %    | n                 | %    | n                              | %    | % †   | n                           | %    | % †   |
| 06           | 1                              | 0.7  | 2                 | 1.5  | 0                              | 0.0  | 0.0   | 0                           | 0.0  | 0.0   |
| 11           | 0                              | 0.0  | 0                 | 0.0  | 0                              | 0.0  | 0.0   | 0                           | 0.0  | 0.0   |
| 16           | 90                             | 66.2 | 88                | 64.7 | 36                             | 26.5 | 55.4  | 4                           | 40.0 | 50.0  |
| 18           | 16                             | 11.8 | 16                | 11.8 | 9                              | 6.6  | 13.8  | 2                           | 20.0 | 25.0  |
| 31           | 5                              | 3.7  | 5                 | 3.7  | 2                              | 1.5  | 3.1   | 0                           | 0.0  | 0.0   |
| 33           | 5                              | 3.7  | 4                 | 2.9  | 1                              | 0.7  | 1.5   | 0                           | 0.0  | 0.0   |
| 35           | 2                              | 1.5  | 3                 | 2.2  | 3                              | 2.2  | 4.6   | 0                           | 0.0  | 0.0   |
| 39           | 2                              | 1.5  | 1                 | 0.7  | 5                              | 3.7  | 7.7   | 0                           | 0.0  | 0.0   |
| 40           | 0                              | 0.0  | 0                 | 0.0  | 0                              | 0.0  | 0.0   | 0                           | 0.0  | 0.0   |
| 42           | 0                              | 0.0  | 0                 | 0.0  | 0                              | 0.0  | 0.0   | 0                           | 0.0  | 0.0   |
| 45           | 6                              | 4.4  | 6                 | 4.4  | 6                              | 4.4  | 9.2   | 1                           | 10.0 | 12.5  |
| 51           | 0                              | 0.0  | 0                 | 0.0  | 5                              | 3.7  | 7.7   | 0                           | 0.0  | 0.0   |
| 52           | 6                              | 4.4  | 7                 | 5.1  | 2                              | 1.5  | 3.1   | 0                           | 0.0  | 0.0   |
| 53           | 1                              | 0.7  | 0                 | 0.0  | 0                              | 0.0  | 0.0   | 0                           | 0.0  | 0.0   |
| 54           | 0                              | 0.0  | 0                 | 0.0  | 1                              | 0.7  | 1.5   | 0                           | 0.0  | 0.0   |
| 56           | 1                              | 0.7  | 1                 | 0.7  | 1                              | 0.7  | 1.5   | 1                           | 10.0 | 12.5  |
| 58           | 7                              | 5.1  | 6                 | 4.4  | 0                              | 0.0  | 0.0   | 0                           | 0.0  | 0.0   |
| 59           | 2                              | 1.5  | 2                 | 1.5  | 0                              | 0.0  | 0.0   | 0                           | 0.0  | 0.0   |
| 66           | 0                              | 0.0  | 0                 | 0.0  | 0                              | 0.0  | 0.0   | 0                           | 0.0  | 0.0   |
| 68/73        | 3                              | 2.2  | 3                 | 2.2  | 2                              | 1.5  | 3.1   | 0                           | 0.0  | 0.0   |
| Any of above | 133                            | 97.8 | 133               | 97.8 | 65                             | 47.8 | 100.0 | 8                           | 80.0 | 100.0 |

\* 68/73 = HPV68 or HPV73.

† Percentage of SPF<sub>10</sub> HPV positives.

**Supplementary Table 3.** Human papillomavirus (HPV) frequencies using pooled results of PGMY09/11 and SPF<sub>10</sub> including additional 11 non-carcinogenic HPV types\*

| HPV type | Control subjects<br>(n=4007) |     |                  |      | CIS/AIS case subjects<br>(n=1213) |      |                  |      | Invasive cancer case subjects<br>(n=808) |      |                  |      |
|----------|------------------------------|-----|------------------|------|-----------------------------------|------|------------------|------|------------------------------------------|------|------------------|------|
|          | All infections               |     | Single infection |      | All infections                    |      | Single infection |      | All infections                           |      | Single infection |      |
|          | n                            | %   | n                | %    | n                                 | %    | n                | %    | n                                        | %    | n                | %    |
| 06       | 80                           | 2.0 | 24               | 0.7  | 12                                | 1.0  | 1                | 0.1  | 4                                        | 0.5  | 2                | 0.3  |
| 11       | 18                           | 0.4 | 4                | 0.1  | 14                                | 1.2  | 1                | 0.1  | 1                                        | 0.1  | 0                | 0.0  |
| 16       | 297                          | 7.4 | 102              | 3.1  | 683                               | 56.3 | 545              | 54.6 | 430                                      | 53.2 | 396              | 53.1 |
| 18       | 91                           | 2.3 | 27               | 0.8  | 72                                | 5.9  | 41               | 4.1  | 106                                      | 13.1 | 91               | 12.2 |
| 26       | 7                            | 0.2 | 0                | 0.0  | 4                                 | 0.3  | 3                | 0.3  | 1                                        | 0.1  | 0                | 0.0  |
| 31       | 117                          | 2.9 | 33               | 1.0  | 153                               | 12.6 | 110              | 11.0 | 35                                       | 4.3  | 24               | 3.2  |
| 33       | 37                           | 0.9 | 8                | 0.2  | 97                                | 8.0  | 64               | 6.4  | 32                                       | 4.0  | 23               | 3.1  |
| 35       | 39                           | 1.0 | 11               | 0.3  | 42                                | 3.5  | 29               | 2.9  | 14                                       | 1.7  | 11               | 1.5  |
| 39       | 132                          | 3.3 | 45               | 1.4  | 20                                | 1.6  | 6                | 0.6  | 22                                       | 2.7  | 15               | 2.0  |
| 40       | 23                           | 0.6 | 3                | 0.1  | 1                                 | 0.1  | 0                | 0.0  | 0                                        | 0.0  | 0                | 0.0  |
| 42       | 48                           | 1.2 | 14               | 0.4  | 3                                 | 0.2  | 0                | 0.0  | 1                                        | 0.1  | 0                | 0.0  |
| 45       | 90                           | 2.2 | 18               | 0.5  | 37                                | 3.1  | 19               | 1.9  | 49                                       | 6.1  | 39               | 5.2  |
| 51       | 120                          | 3.0 | 37               | 1.1  | 59                                | 4.9  | 28               | 2.8  | 9                                        | 1.1  | 7                | 0.9  |
| 52       | 118                          | 2.9 | 41               | 1.2  | 64                                | 5.3  | 29               | 2.9  | 24                                       | 3.0  | 15               | 2.0  |
| 53       | 197                          | 4.9 | 59               | 1.8  | 28                                | 2.3  | 9                | 0.9  | 9                                        | 1.1  | 4                | 0.5  |
| 54       | 140                          | 3.5 | 51               | 1.5  | 3                                 | 0.2  | 1                | 0.1  | 2                                        | 0.2  | 1                | 0.1  |
| 55       | 45                           | 1.1 | 11               | 0.3  | 5                                 | 0.4  | 0                | 0.0  | 1                                        | 0.1  | 0                | 0.0  |
| 56       | 96                           | 2.4 | 30               | 0.9  | 20                                | 1.6  | 6                | 0.6  | 9                                        | 1.1  | 7                | 0.9  |
| 57       | 1                            | 0.0 | 1                | 0.0  | 1                                 | 0.1  | 0                | 0.0  | 0                                        | 0.0  | 0                | 0.0  |
| 58       | 100                          | 2.5 | 25               | 0.8  | 66                                | 5.4  | 49               | 4.9  | 20                                       | 2.5  | 13               | 1.7  |
| 59       | 84                           | 2.1 | 22               | 0.7  | 17                                | 1.4  | 3                | 0.3  | 15                                       | 1.9  | 14               | 1.9  |
| 61       | 124                          | 3.1 | 35               | 1.1  | 3                                 | 0.2  | 0                | 0.0  | 0                                        | 0.0  | 0                | 0.0  |
| 62       | 158                          | 3.9 | 58               | 1.7  | 0                                 | 0.0  | 0                | 0.0  | 0                                        | 0.0  | 0                | 0.0  |
| 64       | 4                            | 0.1 | 1                | 0.0  | 0                                 | 0.0  | 0                | 0.0  | 0                                        | 0.0  | 0                | 0.0  |
| 66       | 91                           | 2.3 | 14               | 0.4  | 13                                | 1.1  | 3                | 0.3  | 2                                        | 0.2  | 2                | 0.3  |
| 67       | 20                           | 0.5 | 5                | 0.2  | 0                                 | 0.0  | 0                | 0.0  | 0                                        | 0.0  | 0                | 0.0  |
| 68/73    | 86                           | 2.1 | 23               | 0.7  | 27                                | 2.2  | 8                | 0.8  | 13                                       | 1.6  | 8                | 1.1  |
| 69       | 8                            | 0.2 | 4                | 0.1  | 0                                 | 0.0  | 0                | 0.0  | 0                                        | 0.0  | 0                | 0.0  |
| 70       | 90                           | 2.2 | 33               | 1.0% | 1                                 | 0.1  | 0                | 0.0  | 1                                        | 0.1  | 0                | 0.0  |
| 71       | 7                            | 0.2 | 3                | 0.1  | 0                                 | 0.0  | 0                | 0.0  | 0                                        | 0.0  | 0                | 0.0  |
| 72       | 33                           | 0.8 | 17               | 0.5  | 0                                 | 0.0  | 0                | 0.0  | 0                                        | 0.0  | 0                | 0.0  |

**Supplementary Table 3.** Human papillomavirus (HPV) frequencies using pooled results of PGMY09/11 and SPF<sub>10</sub> including additional 11 non-carcinogenic HPV types\*

| HPV type         | Control subjects<br>(n=4007) |      |                  |      | CIS/AIS case subjects<br>(n=1213) |      |                  |      | Invasive cancer case subjects<br>(n=808) |      |                  |      |
|------------------|------------------------------|------|------------------|------|-----------------------------------|------|------------------|------|------------------------------------------|------|------------------|------|
|                  | All infections               |      | Single infection |      | All infections                    |      | Single infection |      | All infections                           |      | Single infection |      |
|                  | n                            | %    | n                | %    | n                                 | %    | n                | %    | n                                        | %    | n                | %    |
| 81               | 68                           | 1.7  | 20               | 0.6  | 1                                 | 0.1  | 0                | 0.0  | 0                                        | 0.0  | 0                | 0.0  |
| 82               | 23                           | 0.6  | 5                | 0.2  | 14                                | 1.2  | 6                | 0.6  | 0                                        | 0.0  | 0                | 0.0  |
| 82 var (IS39)    | 8                            | 0.2  | 3                | 0.1  | 0                                 | 0.0  | 0                | 0.0  | 0                                        | 0.0  | 0                | 0.0  |
| 83               | 61                           | 1.5  | 20               | 0.6  | 2                                 | 0.2  | 0                | 0.0  | 0                                        | 0.0  | 0                | 0.0  |
| 84               | 82                           | 2.0  | 23               | 0.7  | 6                                 | 0.5  | 2                | 0.2  | 4                                        | 0.5  | 1                | 0.1  |
| 89               | 69                           | 1.7  | 20               | 0.6  | 0                                 | 0.0  | 0                | 0.0  | 0                                        | 0.0  | 0                | 0.0  |
| Any of the above | 1537                         | 38.4 | 850              | 25.6 | 1178                              | 97.1 | 964              | 96.6 | 735                                      | 91.0 | 673              | 90.2 |

\*CIS/AIS =carcinoma in situ or adenocarcinoma in situ; HPV genotypes 34, 43, and 74 are detected by the SPF<sub>10</sub> assay but were not detected in any specimen. HPV 44 was detected in a single CIS/AIS specimen. 68/73 = HPV68 or HPV73; Var = variant

**Supplementary Table 4.** Relative risks for CIS/AIS and invasive cervical cancer diagnosed 1995–2000 expressed as the percentage risk relative to human papillomavirus (HPV)16\*

| HPV type        | Control subjects (n=4007) |      | CIS/AIS case subjects (n=649) |      | Invasive cancer case subjects (n=226) |      | CIS/AIS |             | Invasive cancer |             |
|-----------------|---------------------------|------|-------------------------------|------|---------------------------------------|------|---------|-------------|-----------------|-------------|
|                 | N                         | %    | N                             | %    | N                                     | %    | RR (%)  | (95% CI)    | RR (%)          | (95% CI)    |
| 16              | 297                       | 7.4  | 350                           | 53.9 | 114                                   | 50.4 | 100     | (referent)  | 100             | (referent)  |
| 06              | 80                        | 2.0  | 6                             | 0.9  | 1                                     | 0.4  | 1       | ( 0 to 3)   | 0               | ( 0 to 3)   |
| 11              | 18                        | 0.4  | 5                             | 0.8  | 1                                     | 0.4  | 10      | ( 3 to 36)  | 3               | ( 0 to 34)  |
| 18              | 91                        | 2.3  | 41                            | 6.3  | 29                                    | 12.8 | 11      | ( 6 to 19)  | 58              | (32 to 103) |
| 31              | 117                       | 2.9  | 85                            | 13.1 | 10                                    | 4.4  | 43      | (29 to 64)  | 7               | ( 3 to 16)  |
| 33              | 37                        | 0.9  | 47                            | 7.2  | 9                                     | 4.0  | 93      | (53 to 164) | 83              | (32 to 215) |
| 35              | 39                        | 1.0  | 28                            | 4.3  | 7                                     | 3.1  | 63      | (34 to 117) | 56              | (21 to 147) |
| 39              | 132                       | 3.3  | 11                            | 1.7  | 11                                    | 4.9  | 1       | ( 0 to 2)   | 8               | ( 3 to 18)  |
| 40†             | 23                        | 0.6  | 1                             | 0.2  | 0                                     | 0.0  | 1       | ( 0 to 5)   | -               | -           |
| 42†             | 48                        | 1.2  | 3                             | 0.5  | 0                                     | 0.0  | 1       | ( 0 to 3)   | -               | -           |
| 45              | 90                        | 2.2  | 17                            | 2.6  | 11                                    | 4.9  | 4       | (2 to 9)    | 14              | ( 6 to 34)  |
| 51              | 120                       | 3.0  | 37                            | 5.7  | 3                                     | 1.3  | 10      | (5 to 17)   | 2               | ( 0 to 7)   |
| 52              | 118                       | 2.9  | 35                            | 5.4  | 7                                     | 3.1  | 10      | (5 to 17)   | 5               | ( 2 to 15)  |
| 53              | 197                       | 4.9  | 16                            | 2.5  | 4                                     | 1.8  | 1       | ( 0 to 2)   | 1               | ( 0 to 3)   |
| 54†             | 140                       | 3.5  | 3                             | 0.5  | 0                                     | 0.0  | 0       | ( 0 to 1)   | -               | -           |
| 56              | 96                        | 2.4  | 9                             | 1.4  | 4                                     | 1.8  | 2       | ( 1 to 6)   | 6               | ( 2 to 18)  |
| 58              | 100                       | 2.5  | 43                            | 6.6  | 3                                     | 1.3  | 16      | ( 9 to 27)  | 1               | ( 0 to 4)   |
| 59              | 84                        | 2.1  | 10                            | 1.5  | 7                                     | 3.1  | 3       | ( 1 to 7)   | 10              | ( 4 to 29)  |
| 66†             | 91                        | 2.3  | 11                            | 1.7  | 0                                     | 0.0  | 2       | ( 1 to 5)   | -               | -           |
| 68/73           | 86                        | 2.1  | 18                            | 2.8  | 6                                     | 2.7  | 5       | ( 2 to 11)  | 9               | ( 3 to 26)  |
| All other types | 646                       | 16.1 | 16                            | 2.5  | 1                                     | 0.4  | 0       | ( 0 to 0)   | 0               | ( 0 to 0)   |
| PCR negative    | 2470                      | 61.6 | 19                            | 2.9  | 19                                    | 8.4  | 0       | ( 0 to 0)   | 0               | ( 0 to 0)   |

\* CIS/AIS =carcinoma in situ or adenocarcinoma in situ; RR = relative risk; 68/73 = HPV68 or HPV73; - = not applicable.

† Not found in invasive cancer and was not included in the logistic regression model.
